# Supplementary material
Source: PubMed Central journal article supplement (PMC5897763)
Supplement: rspa20170858supp1.pdf [file rspa20170858supp1.pdf]

Table 1: Data values for the random first Piola-Kirchhoff shear stress  $P_{12}(k)$  (MPa) of rubberlike material [1].

|                         |      |      |      |      |      |      |      |      |      |      |      |      |      |      |      |
|-------------------------|------|------|------|------|------|------|------|------|------|------|------|------|------|------|------|
| $k$                     | 0.1  | 0.2  | 0.3  | 0.4  | 0.5  | 0.6  | 0.7  | 0.08 | 0.9  | 1    | 1.1  | 1.2  | 1.3  | 1.4  | 1.5  |
|                         | 1.6  | 1.7  | 1.8  | 1.9  | 2    | 2.1  | 2.2  | 2.3  | 2.4  | 2.5  | 2.6  | 2.7  | 2.8  | 2.9  | 3    |
| $\underline{P_{12}(k)}$ | 0.09 | 0.14 | 0.19 | 0.23 | 0.28 | 0.32 | 0.36 | 0.40 | 0.44 | 0.48 | 0.51 | 0.55 | 0.58 | 0.61 | 0.65 |
| (mean)                  | 0.68 | 0.71 | 0.74 | 0.76 | 0.79 | 0.82 | 0.85 | 0.87 | 0.90 | 0.93 | 0.96 | 0.97 | 0.99 | 1.00 | 1.03 |
| $\ P_{12}(k)\ $         | 0.02 | 0.02 | 0.02 | 0.03 | 0.03 | 0.03 | 0.04 | 0.04 | 0.04 | 0.04 | 0.04 | 0.04 | 0.04 | 0.04 | 0.04 |
| (std deviation)         | 0.04 | 0.04 | 0.04 | 0.04 | 0.03 | 0.04 | 0.03 | 0.03 | 0.03 | 0.04 | 0.04 | 0.04 | 0.04 | 0.04 | 0.05 |

Table 2: Data values for the random nonlinear shear modulus  $\tilde{\mu}(a)$  (kPa) of mouse brain tissue [2].

|                              |       |       |       |       |       |       |       |       |       |
|------------------------------|-------|-------|-------|-------|-------|-------|-------|-------|-------|
| $a$                          | 0.6   | 0.7   | 0.8   | 0.9   | 1     | 1.1   | 1.2   | 1.3   | 1.4   |
| $\underline{\tilde{\mu}(a)}$ | 0.754 | 0.567 | 0.457 | 0.295 | 0.191 | 0.154 | 0.169 | 0.167 | 0.181 |
| (mean)                       |       |       |       |       |       |       |       |       |       |
| $\ \tilde{\mu}(a)\ $         | 0.027 | 0.045 | 0.045 | 0.023 | 0.037 | 0.028 | 0.024 | 0.023 | 0.043 |
| (std deviation)              |       |       |       |       |       |       |       |       |       |

Table 3: Data values for the random nonlinear shear modulus  $\tilde{\mu}(a)$  (kPa) of human brain tissue [3].

|                              |        |        |        |        |        |        |        |        |        |        |        |
|------------------------------|--------|--------|--------|--------|--------|--------|--------|--------|--------|--------|--------|
| $a$                          | 0.75   | 0.80   | 0.85   | 0.90   | 0.95   | 1      | 1.05   | 1.10   | 1.15   | 1.20   | 1.25   |
| $\underline{\tilde{\mu}(a)}$ | 1.1254 | 0.9211 | 0.7766 | 0.6134 | 0.4330 | 0.3379 | 0.2142 | 0.2331 | 0.2520 | 0.2835 | 0.3101 |
| (mean)                       |        |        |        |        |        |        |        |        |        |        |        |
| $\ \tilde{\mu}(a)\ $         | 0.1012 | 0.0822 | 0.0666 | 0.0561 | 0.0481 | 0.0396 | 0.0270 | 0.0235 | 0.0204 | 0.0203 | 0.0158 |
| (std deviation)              |        |        |        |        |        |        |        |        |        |        |        |

## References

- [1] Nunes ICS, Moreira DC. 2013. Simple shear under large deformation: experimental and theoretical analyses, European Journal of Mechanics A/Solids 42, 315-322.
- [2] Mihai LA, Chin L, Janmey PA, Goriely A. 2015. A comparison of hyperelastic constitutive models applicable to brain and fat tissues, Journal of the Royal Society Interface 12, 20150486.
- [3] Mihai LA, Budday S, Holzapfel GA, Kuhl E, Goriely A. 2017. A family of hyperelastic models for human brain tissue, Journal of Mechanics and Physics of Solids 106, 60-79.

<sup>1</sup>School of Mathematics, Cardiff University, Senghennydd Road, Cardiff, CF24 4AG, UK, Email: MihaiLA@cardiff.ac.uk

<sup>2</sup>School of Mathematics, Cardiff University, Senghennydd Road, Cardiff, CF24 4AG, UK.

<sup>3</sup>Mathematical Institute, University of Oxford, Woodstock Road, Oxford, OX2 6GG, UK.
